# Supplementary material
Source: PubMed Central journal article supplement (PMC2788894)
Supplement: supp_M109.025692_jbc.M109.025692-1.pdf [file supp_M109.025692_jbc.M109.025692-1.pdf]

## Supplemental Figures and Legends

### HEK + PAR<sub>2</sub> (Flag, HA11)

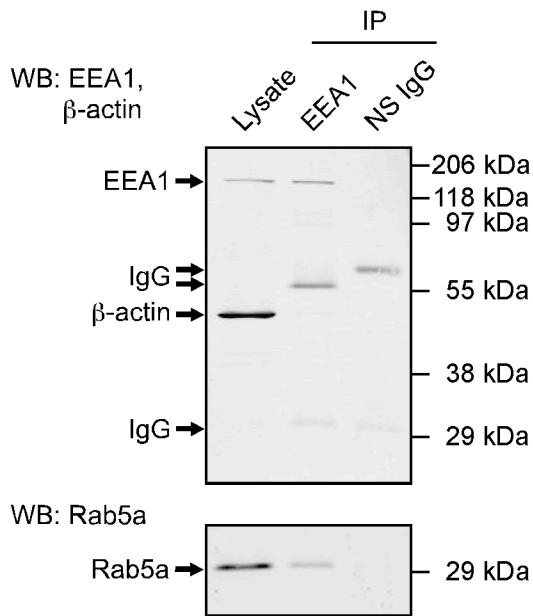

Supplemental figure 1

**Supplemental Figure 1. Endosomal purification.** HEK cells were transiently transfected with PAR<sub>2</sub>. Cells were lysed and immunoprecipitated (IP) with mouse anti-EEA1 antibody or non-specific (NS) mouse IgG<sub>1</sub>. Western blots (WB) were probed for EEA1 and Rab5a (endosome markers) and  $\beta$ -actin (cytosolic marker). Isolated endosomes contained EEA1 and Rab5a but not  $\beta$ -actin, indicating the enrichment of endosomal proteins and a lack of contamination by cytosolic proteins in the endosome preparations.
